# Supplementary material
Source: PubMed Central journal article supplement (PMC5434456)
Supplement: NIHMS861710-supplement-001482_-_Supplemental_Material.pdf [file NIHMS861710-supplement-001482_-_Supplemental_Material.pdf]

# SUPPLEMENTAL MATERIAL

## Supplementary Figures

**Supplementary Figure 1.** Associations between genetically predicted PR segment and P wave durations and EHR phenotypes.

## Supplementary Tables

**Supplementary Table 1:** Characteristics of the eMERGE population.

**Supplementary Table 2:** List of SNPS identified by prior GWAS used to compute genetic risk scores for the PR interval and atrial fibrillation.

**Supplementary Table 3:** List of SNPS identified by prior GWAS used to compute genetic risk scores for body mass index (BMI).

**Supplementary Table 4:** Characteristics of the ARIC population.

**Supplementary Table 5:** Demographics for the eMERGE atrial fibrillation cases and controls.

# Supplementary Figure 1

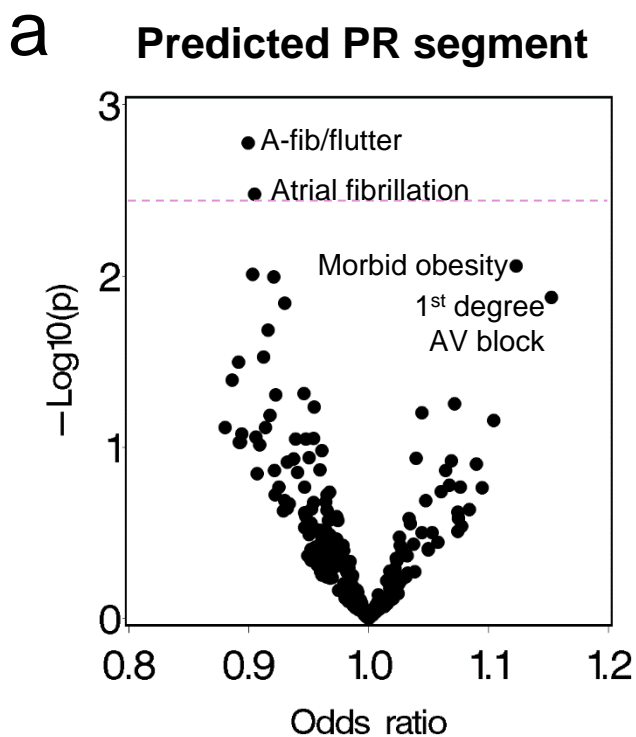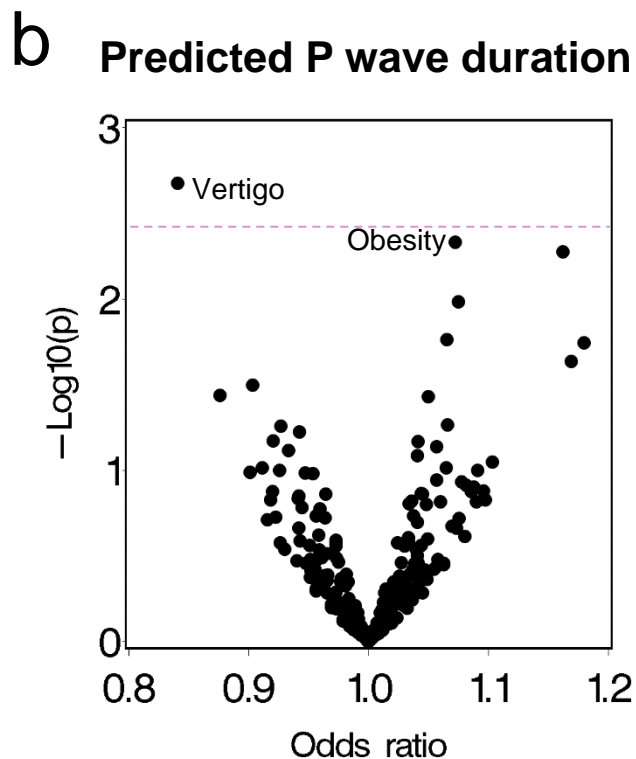

**Supplementary Figure 1.** Plot of p-value versus odds-ratio (OR) from logistic regression analyses of the association between a genetically predicted a) PR segment or b) P wave duration and 261 eMERGE phenotypes, adjusted for sex, gender and principal components. ORs represent the risk per standard deviation change in the predicted value. For all graphs, each point represents a phenotype and green colored points have an FDR  $q < 0.1$ . The purple line denotes the expected false positive rate ( $=1/261$ ).

**Supplementary Table 1:** Characteristics of the eMERGE population.

| <b>Characteristic</b>                                   |                                                                     |                  |
|---------------------------------------------------------|---------------------------------------------------------------------|------------------|
| <b>Gender [n (%)]</b>                                   |                                                                     |                  |
|                                                         | Males                                                               | 6,253 (48.2)     |
|                                                         | Females                                                             | 6,725 (51.8)     |
| <b>Birth Decade</b>                                     |                                                                     |                  |
|                                                         | median (IQR)                                                        | 1940 (1920-1950) |
| <b>Distinct PheWAS codes per subject</b>                |                                                                     |                  |
|                                                         | median (IQR)                                                        | 44 (21-76)       |
| <b>Phenotypes used for genetic correlation analyses</b> |                                                                     |                  |
|                                                         | <b>Cases</b>                                                        | <b>Controls</b>  |
|                                                         | Hypertension                                                        | 3,425            |
|                                                         | Essential hypertension                                              | 3,425            |
|                                                         | Disorders of lipid metabolism                                       | 3,896            |
|                                                         | Hyperlipidemia                                                      | 3,896            |
|                                                         | Osteoarthritis                                                      | 5,348            |
|                                                         | Pain in limb                                                        | 5,357            |
|                                                         | Peripheral enthesopathies and allied syndromes                      | 4,805            |
|                                                         | Osteoarthritis NOS                                                  | 5,128            |
|                                                         | Hypercholesterolemia                                                | 3,611            |
|                                                         | Ischemic Heart Disease                                              | 5,606            |
|                                                         | Acute upper respiratory infections of multiple or unspecified sites | 5,486            |
|                                                         | Coronary atherosclerosis                                            | 5,282            |
|                                                         | Overweight, obesity and other hyperalimentation                     | 6,730            |
|                                                         | Diabetes mellitus                                                   | 6,532            |
|                                                         | GERD                                                                | 5,621            |
|                                                         | Type 2 diabetes                                                     | 6,504            |
|                                                         | Obesity                                                             | 6,265            |
|                                                         | Benign neoplasm of colon                                            | 6,592            |
|                                                         | Diverticulosis and diverticulitis                                   | 4,194            |
|                                                         | Hemorrhoids                                                         | 4,612            |
|                                                         | Dizziness and giddiness (Light-headedness and vertigo)              | 6,247            |
|                                                         | Diverticulosis                                                      | 3,975            |
|                                                         | Anxiety, phobic and dissociative disorders                          | 5,101            |
|                                                         | Glaucoma                                                            | 3,866            |
|                                                         | Other headache syndromes                                            | 6,695            |
|                                                         | Other peripheral nerve disorders                                    | 6,587            |
|                                                         | Atherosclerosis                                                     | 3,770            |
|                                                         | Impacted cerumen                                                    | 4,998            |

|                                                                                      |       |       |
|--------------------------------------------------------------------------------------|-------|-------|
| Atrial fibrillation and flutter                                                      | 1,600 | 3,166 |
| Atrial fibrillation                                                                  | 1,547 | 3,128 |
| Peripheral vascular disease                                                          | 1,539 | 4,415 |
| Sprains and strains of back and neck                                                 | 1,533 | 2,484 |
| Diseases of sebaceous glands                                                         | 1,533 | 5,898 |
| Tobacco use disorder                                                                 | 1,527 | 7,094 |
| Nausea and vomiting                                                                  | 1,442 | 6,713 |
| Peripheral vascular disease, unspecified                                             | 1,361 | 3,812 |
| Atherosclerosis of the extremities                                                   | 1,318 | 3,128 |
| Other arthropathies                                                                  | 1,227 | 6,186 |
| Urinary incontinence                                                                 | 1,098 | 3,990 |
|                                                                                      | 1,074 | 4,941 |
| Otitis media and Eustachian tube disorders                                           |       |       |
| Angina pectoris                                                                      | 1,029 | 3,755 |
| Other chronic ischemic heart disease, unspecified                                    | 953   | 3,382 |
| Sebaceous cyst                                                                       | 924   | 4,526 |
| Atherosclerosis of native arteries of the extremities with intermittent claudication | 890   | 1,878 |
| Dementias                                                                            | 889   | 2,179 |
| Varicose veins                                                                       | 824   | 3,203 |
| Other upper respiratory disease                                                      | 813   | 3,322 |
| Otitis media                                                                         | 801   | 3,790 |
| Adjustment reaction                                                                  | 777   | 3,079 |
| Other persistent mental disorders due to conditions classified elsewhere             | 760   | 2,709 |
| Varicose veins of lower extremity                                                    | 748   | 3,034 |
| Disorders of function of stomach                                                     | 729   | 3,831 |
|                                                                                      | 678   | 3,201 |
| Symptoms involving cardiovascular system                                             |       |       |
| Fracture of unspecified bones                                                        | 662   | 3,831 |
| Dyspepsia and other specified disorders of function of stomach                       | 655   | 3,484 |
| Corns and callosities                                                                | 649   | 3,284 |
| Other aneurysm                                                                       | 617   | 2,780 |
| Morbid obesity                                                                       | 602   | 3,600 |
| Cellulitis and abscess of leg, except foot                                           | 598   | 3,668 |
| Alzheimer's disease                                                                  | 590   | 1,860 |
| Hyposmolality and/or hyponatremia                                                    | 583   | 3,375 |
| Type 2 diabetes with neurological manifestations                                     | 525   | 3,479 |
| Lymphadenitis                                                                        | 501   | 3,679 |

**Supplementary Table 2:** List of SNPs available in each data set for use in computing genetic risk scores for either the PR interval or atrial fibrillation. Shown are the published weights used from computing GRSs. In addition, association statistics for either the PR interval or AF, respectively, are shown.

| Phenotype   | SNP        | Beta (s.e.) for the PR interval from prior GWAS* | OR (95% CI) for AF in the eMERGE data set |
|-------------|------------|--------------------------------------------------|-------------------------------------------|
| PR interval | rs11897119 | 1.4 (0.2)                                        | 0.98 (0.89-1.08)                          |
|             | rs11708996 | 3.0 (0.3)                                        | 0.92 (0.81-1.06)                          |
|             | rs6800541  | 3.8 (0.2)                                        | 0.89 (0.81-0.98)                          |
|             | rs7692808  | -2.0 (0.2)                                       | 1.05 (0.95-1.17)                          |
|             | rs251253   | -1.5 (0.2)                                       | 0.92 (0.83-1.02)                          |
|             | rs3807989  | 2.3 (0.2)                                        | 0.92 (0.84-1.01)                          |
|             | rs4944092  | -1.2 (0.2)                                       | 1.06 (0.96-1.18)                          |
|             | rs1896312  | 2.0 (0.2)                                        | 0.98 (0.88-1.09)                          |

| Association in ARIC data set |            |                                                  |                    |                        |                             |
|------------------------------|------------|--------------------------------------------------|--------------------|------------------------|-----------------------------|
| Phenotype                    | SNP        | OR (95% CI) for AF previously reported by GWAS** | PR interval (s.e.) | Beta PR segment (s.e.) | P wave duration Beta (s.e.) |
| Atrial fibrillation          | rs6666258  | 1.18 (1.13–1.23)                                 | -0.69 (0.45)       | -0.43 (0.44)           | -0.28 (0.23)                |
|                              | rs3903239  | 1.14 (1.10–1.18)                                 | 0.63 (0.42)        | 0.64 (0.40)            | 0.03 (0.21)                 |
|                              | rs6817105  | 1.64 (1.55–1.73)                                 | 1.37 (0.66)        | 0.91 (0.64)            | 0.54 (0.33)                 |
|                              | rs2040862  | 1.15 (1.09–1.21)                                 | 0.00 (0.55)        | -0.14 (0.53)           | 0.13 (0.27)                 |
|                              | rs3807989  | 0.88 (0.84–0.91)                                 | 2.18 (0.43)        | 1.51 (0.42)            | 0.61 (0.21)                 |
|                              | rs10821415 | 1.13 (1.08–1.18)                                 | -0.29 (0.42)       | -0.44 (0.41)           | 0.18 (0.21)                 |
|                              | rs10824026 | 0.85 (0.81–0.90)                                 | -0.39 (0.58)       | -1.10 (0.56)           | 0.67 (0.29)                 |
|                              | rs1152591  | 1.13 (1.09–1.18)                                 | 0.71 (0.43)        | 0.55 (0.41)            | 0.19 (0.21)                 |
|                              | rs7164883  | 1.16 (1.10–1.22)                                 | -1.30 (0.57)       | -1.32 (0.55)           | 0.06 (0.28)                 |
|                              | rs2106261  | 1.24 (1.17–1.30)                                 | -0.37 (0.55)       | -0.62 (0.54)           | 0.28 (0.28)                 |

\* Pfeufer A, van Noord C, Marcianti KD, Arking DE, Larson MG, Smith AV et al. Genome-wide association study of PR interval. Nat Genet 2010; 42: 153–159.

\*\*Ellinor PT, Lunetta KL, Albert CM, Glazer NL, Ritchie MD, Smith AV et al. Meta-analysis identifies six new susceptibility loci for atrial fibrillation. Nat Genet 2012; 44: 670–675.

**Supplementary Table 3:** List of previously\* published SNPs and weights used to compute a BMI genetic risk score.

\*Locke AE, Kahali B, Berndt SI, Justice AE, Pers TH, Day FR *et al.* Genetic studies of body mass index yield new insights for obesity biology. *Nature* 2015; **518**: 197–206.

| SNP        | Beta  |
|------------|-------|
| rs1558902  | 0.082 |
| rs6567160  | 0.056 |
| rs13021737 | 0.060 |
| rs10938397 | 0.040 |
| rs543874   | 0.048 |
| rs2207139  | 0.045 |
| rs11030104 | 0.041 |
| rs3101336  | 0.033 |
| rs7138803  | 0.032 |
| rs10182181 | 0.031 |
| rs3888190  | 0.031 |
| rs1516725  | 0.045 |
| rs12446632 | 0.040 |
| rs2287019  | 0.036 |
| rs16951275 | 0.031 |
| rs3817334  | 0.026 |
| rs2112347  | 0.026 |
| rs12566985 | 0.024 |
| rs3810291  | 0.028 |
| rs7141420  | 0.024 |
| rs13078960 | 0.030 |
| rs10968576 | 0.025 |
| rs17024393 | 0.066 |
| rs657452   | 0.023 |
| rs12429545 | 0.033 |
| rs12286929 | 0.022 |
| rs13107325 | 0.048 |
| rs11165643 | 0.022 |
| rs7903146  | 0.023 |
| rs10132280 | 0.023 |
| rs17405819 | 0.022 |
| rs6091540  | 0.019 |
| rs1016287  | 0.023 |
| rs4256980  | 0.021 |
| rs17094222 | 0.025 |
| rs12401738 | 0.021 |
| rs7599312  | 0.022 |
| rs2365389  | 0.020 |
| rs205262   | 0.022 |
| rs2820292  | 0.020 |
| rs12885454 | 0.021 |
| rs9641123  | 0.019 |

|            |       |
|------------|-------|
| rs12016871 | 0.030 |
| rs16851483 | 0.048 |
| rs1167827  | 0.020 |
| rs758747   | 0.023 |
| rs1928295  | 0.019 |
| rs9925964  | 0.019 |
| rs11126666 | 0.021 |
| rs2650492  | 0.021 |
| rs6804842  | 0.019 |
| rs12940622 | 0.018 |
| rs7164727  | 0.018 |
| rs11847697 | 0.049 |
| rs4740619  | 0.018 |
| rs492400   | 0.016 |
| rs13191362 | 0.028 |
| rs3736485  | 0.018 |
| rs17001654 | 0.031 |
| rs11191560 | 0.031 |
| rs2080454  | 0.017 |
| rs7715256  | 0.016 |
| rs2176040  | 0.014 |
| rs1528435  | 0.018 |
| rs2075650  | 0.026 |
| rs1000940  | 0.019 |
| rs2033529  | 0.019 |
| rs11583200 | 0.018 |
| rs7239883  | 0.016 |
| rs2836754  | 0.016 |
| rs9400239  | 0.019 |
| rs10733682 | 0.017 |
| rs11688816 | 0.017 |
| rs11057405 | 0.031 |
| rs9914578  | 0.020 |
| rs977747   | 0.017 |
| rs2121279  | 0.025 |
| rs29941    | 0.018 |
| rs11727676 | 0.036 |
| rs3849570  | 0.019 |
| rs9374842  | 0.019 |
| rs6477694  | 0.017 |
| rs4787491  | 0.016 |
| rs1441264  | 0.018 |
| rs7899106  | 0.040 |
| rs2176598  | 0.020 |
| rs2245368  | 0.032 |
| rs17203016 | 0.021 |
| rs17724992 | 0.019 |
| rs7243357  | 0.022 |
| rs16907751 | 0.035 |

|            |       |
|------------|-------|
| rs1808579  | 0.017 |
| rs13201877 | 0.023 |
| rs2033732  | 0.019 |
| rs9540493  | 0.017 |
| rs1460676  | 0.020 |
| rs6465468  | 0.017 |



**Supplementary Table 4:** Characteristics of the ARIC population.  
See Methods for metabolic trait definitions.

| <b>Characteristic</b>               | <b>Value</b> |
|-------------------------------------|--------------|
| <b>Gender [n (%)]</b>               |              |
| Males                               | 3,040 (45.2) |
| Females                             | 3,691 (54.8) |
| <b>Age at first visit (years)</b>   |              |
| median (IQR)                        | 54 (49-59)   |
| <b>Metabolic traits [n (%)]</b>     |              |
| Waist circumference                 | 3,242 (48.1) |
| Insulin Resistance                  | 444 (6.6)    |
| Hypertension                        | 1,341 (19.9) |
| Triglycerides                       | 1,983 (29.5) |
| HDL cholesterol                     | 2,698 (44.1) |
| Metabolic syndrome                  | 1,435 (21.3) |
| <b>EKG parameters [mean (s.d.)]</b> |              |
| PR interval duration (ms)           | 159 (23)     |
| P wave duration (ms)                | 105 (12)     |
| PR segment duration (ms)            | 55 (28)      |

**Supplementary Table 5:** Demographics for the eMERGE atrial fibrillation cases and controls. Comorbidities are based on ICD-9 pheWAS codes, as described in the methods.

| <b>Characteristic</b>                    | <b>AF cases<br/>(n=1,547)</b> | <b>AF controls<br/>(n=3,128)</b> |
|------------------------------------------|-------------------------------|----------------------------------|
| <b>Gender [n (%)]</b>                    |                               |                                  |
| Males                                    | 867 (56.0)                    | 1,642 (52.5)                     |
| Females                                  | 680 (44.0)                    | 1,486 (47.5)                     |
| <b>Birth Decade</b>                      |                               |                                  |
| median (IQR)                             | 1925 (1915-1935)              | 1935 (1925-1945)                 |
| <b>Comorbidities<sup>1</sup> [n (%)]</b> |                               |                                  |
| Essential hypertension                   | 1249 (80.7)                   | 1467 (46.9)                      |
| Coronary atherosclerosis                 | 851 (55.0)                    | 380 (12.1)                       |
| Congestive heart failure                 | 809 (52.3)                    | 111 (3.5)                        |
| Hemorrhage due to anticoagulants         | 789 (51.0)                    | 151 (4.8)                        |
| Cerebrovascular disease                  | 602 (38.9)                    | 360 (11.5)                       |
| Heart valve disorders                    | 536 (34.6)                    | 152 (4.9)                        |
| Renal failure                            | 499 (32.3)                    | 195 (6.2)                        |
| Type 2 diabetes                          | 499 (32.3)                    | 526 (16.8)                       |
| Chronic airway obstruction               | 442 (28.6)                    | 256 (8.2)                        |
| Myocardial infarction                    | 394 (25.5)                    | 84 (2.7)                         |
| Cardiomegaly                             | 365 (23.6)                    | 54 (1.7)                         |
| Tobacco use disorder                     | 246 (15.9)                    | 361 (11.5)                       |
